# Supplementary material
Source: ML conference proceedings conference paper supplement (https://openaccess.thecvf.com/content/CVPR_2019/html/Zhu_Binary_Ensemble_Neural_CVPR_2019_paper.html)
Supplement: Supplementary file 1 [file Zhu_Binary_Ensemble_Neural_CVPR_2019_supplemental.pdf]

# Binary Ensemble Neural Network: More Bits per Network or More Networks per Bit? Supplementary Material

Shilin Zhu  
UC San Diego  
La Jolla, CA 92093  
shz338@eng.ucsd.edu

Xin Dong  
Harvard University  
Cambridge, MA 02138  
xindong@g.harvard.edu

Hao Su  
UC San Diego  
La Jolla, CA 92093  
haosu@eng.ucsd.edu

## 1. Overview

In this document, we provide detailed analysis of BNN, DNN and BENN in Sec. 2. The training algorithm of BENN is provided in Sec. 3, and Sec. 4 presents network architectures used in our main paper.

## 2. Detailed Analysis on DNN, BNN, and BENN

Given a full-precision real valued DNN  $f_w$  with a set of parameters  $w \sim N(0, \sigma_w^2)$ , a BNN  $f_{w_b}$  with binarized parameters  $w_b$ , input vector  $x \sim N(0, 1)$  (after Batch Normalization) and perturbation  $\Delta x \sim N(0, \sigma^2)$ , and a BENN  $f_{w_{\text{benn}}}$  with  $K$  ensembles, we want to compare their robustness w.r.t. the input perturbation. Here we analyze the variance of output change before and after perturbation, which echoes Eq.1 in Sec.3 in the main paper. This is because the output change has zero mean and its variance reflects the distribution of output variation. More specifically, larger variance means increased variation of output w.r.t. input perturbation.

Assume  $f_w, f_{w_b}, f_{w_{\text{benn}}}$  are outputs before non-linear activation function of a single neuron in an one-layer network, we have the output variation of real-value DNN:

$$f_w(x + \Delta x) - f_w(x) = w \odot (x + \Delta x) - w \odot x = w \odot \Delta x$$

whose distribution has variance  $\sigma_r^2 = |w|\sigma_w^2\sigma^2$ , where  $|w|$  denotes number of input connections for this neuron and  $\odot$  denotes inner product. This is because summation of multiple independent distributions (due to inner product  $\odot$ ) has variance summed as well. Some modern non-linear activation function  $g(\cdot)$  like ReLU will not change the inequality of variances (i.e., if  $\sigma_{f_a}^2(x) > \sigma_{f_b}^2(x)$ , then  $\sigma_{g(f_a(x))}^2 > \sigma_{g(f_b(x))}^2$ ), thus we can omit them in the analysis to keep it simple.

## 2.1. Activation Binarization

Suppose  $w$  is real valued but only input binarized (denote as  $f_w^b$ ), the activation binarization (-1 and +1) has threshold 0, then the output variation is:

$$f_w^b(x + \Delta x) - f_w^b(x) = w \odot \text{sign}(x + \Delta x) - w \odot \text{sign}(x)$$

whose distribution has variance  $\sigma_{A_b}^2 = |w|\sigma_w^2\sigma_{\text{sign}(x+\Delta x)-\text{sign}(x)}^2$ . This is because  $\text{sign}(x) \in \{-1, +1\}$  so the inner product is just the summation of  $|w|$  independent distributions, each having variance  $\sigma_{\text{sign}(x+\Delta x)-\text{sign}(x)}^2$ . Note that  $\gamma = \text{sign}(x + \Delta x) - \text{sign}(x)$  only has three possible values, namely, 0, -2 and +2. We compute each of them as follows:

$$\begin{aligned} \Pr(\gamma = 2) &= \Pr(x < 0 \text{ AND } x + \Delta x > 0) \\ &= \Pr(\Delta x > -x | x < 0) \Pr(x < 0) \\ &= \int_{-\infty}^{0^-} \left[ \int_{-x}^{\infty} \frac{1}{\sqrt{2\pi}\sigma} e^{-\frac{(\Delta x)^2}{2\sigma^2}} d(\Delta x) \right] \frac{1}{\sqrt{2\pi}} e^{-\frac{x^2}{2}} dx \\ \Pr(\gamma = -2) &= \Pr(x > 0 \text{ AND } x + \Delta x < 0) \\ &= \Pr(\Delta x < -x | x > 0) \Pr(x > 0) \\ &= \int_{0^+}^{\infty} \left[ \int_{-\infty}^{-x} \frac{1}{\sqrt{2\pi}\sigma} e^{-\frac{(\Delta x)^2}{2\sigma^2}} d(\Delta x) \right] \frac{1}{\sqrt{2\pi}} e^{-\frac{x^2}{2}} dx \\ \Pr(\gamma = 0) &= 1 - \Pr(\gamma = \pm 2) \end{aligned}$$

and its variance can be computed by:

$$\begin{aligned} \sigma_{A_b}^2 &= |w|\sigma_w^2 \{ \mathbb{E}[\gamma^2] - \mathbb{E}^2[\gamma] \} \\ &= |w|\sigma_w^2 \{ \mathbb{E}[\gamma^2] \} \end{aligned}$$

since  $\mathbb{E}[(\text{sign}(x + \Delta x) - \text{sign}(x))] = 0$ . Unfortunately this integral is too complicated to be solved by analytical formula, thus we use numerical method to obtain  $\Pr(\text{sign}(x + \Delta x) - \text{sign}(x) = \pm 2)$ . Therefore, the variance is:

$$\sigma_{A_b}^2 = B|w|\sigma_w^2, \sigma_r^2 = R|w|\sigma_w^2$$

Table 1. Relation between B, R and  $\sigma$ 

| $\sigma$ | B           | R               |
|----------|-------------|-----------------|
| 1.5      | <b>1.25</b> | 2.25            |
| 1.0      | 1.0         | 1.0             |
| 0.5      | 0.59        | <b>0.25</b>     |
| 0.1      | 0.13        | <b>0.01</b>     |
| 0.01     | 0.013       | <b>0.0001</b>   |
| 0.001    | 0.0013      | <b>0.000001</b> |

where  $B(= \sigma_{\text{sign}(x+\Delta x) - \text{sign}(x)}^2)$  and  $R(= \sigma^2)$  can be found in Table 1. When  $\sigma < 1$ , robustness of BNN is worse than DNN's. As for BENN-Bagging with  $K$  ( $K > 1$ ) ensembles, the output change has variance:

$$\sigma_{\text{benn}}^2 = K\sigma_{A_b}^2 \cdot \frac{1}{K^2} = \frac{\sigma_{A_b}^2}{K} = \frac{B}{K}|w|\sigma_w^2 < \sigma_{A_b}^2$$

thus BENN-Bagging has better robustness than BNN. If  $K > \frac{\sigma_{A_b}^2}{\sigma_r^2} = \frac{B}{R}$ , then BENN-Bagging can have even better robustness than DNN.

## 2.2. Weight Binarization

If we binarize  $w$  to  $w_b$  but keeping the activation real-valued, the output variation follows:

$$f_{w_b}(x + \Delta x) - f_{w_b}(x) = \text{sign}(w) \odot \Delta x$$

with variance  $\sigma_{W_b}^2 = |w|\sigma_{\text{sign}(w)}^2\sigma^2 = |w|\sigma^2$ . Thus whether weight binarization will hurt robustness or not depends on whether  $\sigma_{\text{sign}(w)}^2 = 1 > \sigma_w^2$  holds or not. In particular, the robustness will not decrease if  $\sigma_w^2 = 1$ . BENN-Bagging has variance  $\sigma_{\text{benn}}^2 = \frac{1}{K}|w|\sigma^2$ . So if  $K > \frac{1}{\sigma_w^2}$ , then BENN-Bagging is better than DNN.

## 2.3. Binarization of Both Weight and Activation

If both activation and weight are binarized (denote as  $f_{w_b}^b$ ), the output variation:

$$f_{w_b}^b(x + \Delta x) - f_{w_b}^b(x) = \text{sign}(w) \odot [\text{sign}(x + \Delta x) - \text{sign}(x)]$$

has variance  $\sigma_{E_b}^2 = |w|\sigma_{\text{sign}(w)}^2(\sigma_{\text{sign}(x+\Delta x) - \text{sign}(x)}^2) = B|w|$  which is just the combination of Sec. 2.1 and Sec. 2.2. BENN-Bagging has variance  $\sigma_{\text{benn}}^2 = \frac{B}{K}|w|$ , which is more robust than DNN when  $K > \frac{\sigma_{E_b}^2}{\sigma_r^2} = \frac{B}{R\sigma_w^2}$ .

The above analysis results in the following theorem:

**Theorem 1** *Given a activation binarization, weight binarization or extreme binarization one-layer network introduced above, input perturbation is  $\Delta x \sim N(0, \sigma^2)$ , then the output variation obeys:*

1. *If only activation is binarized, BNN has worse robustness than DNN when perturbation  $\sigma < 1$ . BENN-Bagging is guaranteed to be more robust than BNN. BENN-Bagging with  $K$  ensembles is more robust than DNN when  $K > \frac{B}{R}$ .*

2. *If only weight is binarized, BNN has worse robustness than DNN when  $\sigma_w < 1$ . BENN-Bagging is guaranteed to be more robust than BNN. BENN-Bagging with  $K$  ensembles is more robust than DNN when  $K > \frac{1}{\sigma_w^2}$ .*
3. *If both weight and activation are binarized, BNN has worse robustness than DNN when  $\sigma_w < 1$  and perturbation  $\sigma < 1$ . BENN-Bagging is guaranteed to be more robust than BNN. BENN-Bagging with  $K$  ensembles is more robust than DNN when  $K > \frac{B}{R\sigma_w^2}$ .*

## 2.4. Multiple Layers Scenario

All the above analysis is for one layer models before and after activation function. The same conclusion can be extended to multiple layers scenario with Theorem 2.

**Theorem 2** *Given a activation binarization, weight binarization or extreme binarization  $L$ -layer network (without batch normalization for generalization) introduced above, input perturbation is  $\Delta x \sim N(0, \sigma^2)$ , then the accumulated perturbation of ultimate network output obeys:*

1. *For DNN, ultimate output variation is  $\sigma_r^2 \leq \sigma^2 \prod_{l=1}^L |w_l|\sigma_{w_l}^2$ .*
2. *For activation binarization BNN, ultimate output variation is  $\sigma_{A_b}^2 \leq B \prod_{l=1}^L |w_l|\sigma_{w_l}^2$ .*
3. *For weight binarization BNN, ultimate output variation is  $\sigma_{W_b}^2 \leq \sigma^2 \prod_{l=1}^L |w_l|$ .*
4. *For extreme binarization BNN, ultimate output variation is  $\sigma_{E_b}^2 \leq B \prod_{l=1}^L |w_l|$ .*
5. *Theorem 1 holds for multiple layers scenario.*

People have not fully understood the effect of variance reduction in boosting algorithms and some debates still exist in literature [1, 3], given that classifiers are not independent with each other. However, our experiments show that BENN-boosting can also reduce variance in our situation, which is consistent with [2, 3]. The theoretical analysis on BENN-boosting is left for future work.

If we switch  $x$  and  $w$ , replace input perturbation  $\Delta x$  with parameter perturbation  $\Delta w$  in the above analysis, then the same conclusion holds for parameter perturbation (stability issue). To sum up, BNN often can be worse than DNN in terms of robustness and stability, and our method BENN can cure these problems.

### 3. Training Process of BENN

---

**Algorithm 1: Training Process of BENN**


---

```

1 Input: a full-precision neural net with  $L$  layers,  $f$ 
  elements in convolution kernel and learning rate  $\eta$ ,
  initial weight  $u_i$  for each training example  $i$  and
  number of ensemble rounds  $K$ . Initialize BNN with a
  pre-trained XNOR-Net model [5]. Retrain each BNN
  for maximally  $M$  epochs.
2 Ensemble Pass:
3 for  $k=1$  to  $K$  do
4   Sampling a new training set given weight  $u_i$  of
     each example  $i$ ;
5   for  $epoch=1$  to  $M$  do
6     Forward Pass:
7     for  $l=1$  to  $L$  do
8       for each filter in  $l$ -th layer do
9          $a^l = \frac{1}{f} ||w_t^l||_{l1}$ ;
10         $b^l = \text{Sign}(w_t^l)$ ;
11         $w_b^l = a^l b^l$ 
12       end
13       Compute activation  $a_l$  based on binary
         kernel  $w_b^l$  and input  $a_{l-1}$ ;
14     end
15     Backward Pass:
16     Compute gradient  $\frac{\partial J}{\partial w_t}$  based on [5, 4];
17     Parameter Update:
18     Update  $w_t$  to  $w_{t+1}$  with any update rules (e.g.,
       SGD or ADAM)
19   end
20   Ensemble Update:
21   Pick the BNN when training converges;
22   Use either bagging or boosting algorithm to update
     weight  $u_i$  of each training example  $i$ ;
23 end
24 Return:  $K$  trained base classifiers for BENN;

```

---

### 4. Network Architectures Used in the Paper

In this section we provide network architectures used in the experiments of our main paper.

#### 4.0.1 Self-Designed Network-In-Network (NIN)

Table 2. Self-Designed Network-In-Network (NIN)

| Layer Index | Type      | Parameters                                          |
|-------------|-----------|-----------------------------------------------------|
| 1           | Conv      | Depth: 192, Kernel Size: 5x5, Stride: 1, Padding: 2 |
| 2           | BatchNorm | $\epsilon$ : 0.0001, Momentum: 0.1                  |
| 3           | ReLU      | -                                                   |
| 4           | BatchNorm | $\epsilon$ : 0.0001, Momentum: 0.1                  |
| 5           | Dropout   | $p$ : 0.5                                           |
| 6           | Conv      | Depth: 96, Kernel Size: 1x1, Stride: 1, Padding: 0  |
| 7           | ReLU      | -                                                   |
| 8           | MaxPool   | Kernel: 3x3, Stride: 2, Padding: 1                  |
| 9           | BatchNorm | $\epsilon$ : 0.0001, Momentum: 0.1                  |
| 10          | Dropout   | $p$ : 0.5                                           |
| 11          | Conv      | Depth: 192, Kernel Size: 5x5, Stride: 1, Padding: 2 |
| 12          | ReLU      | -                                                   |
| 13          | BatchNorm | $\epsilon$ : 0.0001, Momentum: 0.1                  |
| 14          | Dropout   | $p$ : 0.5                                           |
| 15          | Conv      | Depth: 192, Kernel Size: 1x1, Stride: 1, Padding: 0 |
| 16          | ReLU      | -                                                   |
| 17          | AvgPool   | Kernel: 3x3, Stride: 2, Padding: 1                  |
| 18          | BatchNorm | $\epsilon$ : 0.0001, Momentum: 0.1                  |
| 19          | Dropout   | $p$ : 0.5                                           |
| 20          | Conv      | Depth: 192, Kernel Size: 3x3, Stride: 1, Padding: 1 |
| 21          | ReLU      | -                                                   |
| 22          | BatchNorm | $\epsilon$ : 0.0001, Momentum: 0.1                  |
| 23          | Conv      | Depth: 192, Kernel Size: 1x1, Stride: 1, Padding: 0 |
| 24          | ReLU      | -                                                   |
| 25          | BatchNorm | $\epsilon$ : 0.0001, Momentum: 0.1                  |
| 26          | Conv      | Depth: 192, Kernel Size: 1x1, Stride: 1, Padding: 0 |
| 27          | ReLU      | -                                                   |
| 28          | AvgPool   | Kernel: 8x8, Stride: 1, Padding: 0                  |
| 29          | FC        | Width: 1000                                         |

#### 4.0.2 AlexNet

Table 3. AlexNet

| Layer Index | Type      | Parameters                                           |
|-------------|-----------|------------------------------------------------------|
| 1           | Conv      | Depth: 96, Kernel Size: 11x11, Stride: 4, Padding: 0 |
| 2           | ReLU      | -                                                    |
| 3           | MaxPool   | Kernel: 3x3, Stride: 2                               |
| 4           | BatchNorm | -                                                    |
| 5           | Conv      | Depth: 256, Kernel Size: 5x5, Stride: 1, Padding: 2  |
| 6           | ReLU      | -                                                    |
| 7           | MaxPool   | Kernel: 3x3, Stride: 2                               |
| 8           | BatchNorm | -                                                    |
| 9           | Conv      | Depth: 384, Kernel Size: 3x3, Stride: 1, Padding: 1  |
| 10          | ReLU      | -                                                    |
| 11          | Conv      | Depth: 384, Kernel Size: 3x3, Stride: 1, Padding: 1  |
| 12          | ReLU      | -                                                    |
| 13          | Conv      | Depth: 256, Kernel Size: 3x3, Stride: 1, Padding: 1  |
| 14          | ReLU      | -                                                    |
| 15          | MaxPool   | Kernel: 3x3, Stride: 2                               |
| 16          | Dropout   | $p$ : 0.5                                            |
| 17          | FC        | Width: 4096                                          |
| 18          | ReLU      | -                                                    |
| 19          | Dropout   | $p$ : 0.5                                            |
| 20          | FC        | Width: 4096                                          |
| 21          | ReLU      | -                                                    |
| 22          | FC        | Width: 1000                                          |

#### 4.0.3 ResNet-18

Table 4. ResNet-18

| Layer Index | Type      | Parameters                                          |
|-------------|-----------|-----------------------------------------------------|
| 1           | Conv      | Depth: 64, Kernel Size: 7x7, Stride: 2, Padding: 3  |
| 2           | BatchNorm | $\epsilon$ : 0.00001, Momentum: 0.1                 |
| 3           | ReLU      | -                                                   |
| 4           | MaxPool   | Kernel: 3x3, Stride: 2                              |
| 5           | Conv      | Depth: 64, Kernel Size: 3x3, Stride: 1, Padding: 1  |
| 6           | BatchNorm | $\epsilon$ : 0.00001, Momentum: 0.1                 |
| 7           | ReLU      | -                                                   |
| 8           | Conv      | Depth: 64, Kernel Size: 3x3, Stride: 1, Padding: 1  |
| 9           | BatchNorm | $\epsilon$ : 0.00001, Momentum: 0.1                 |
| 10          | Conv      | Depth: 64, Kernel Size: 3x3, Stride: 1, Padding: 1  |
| 11          | BatchNorm | $\epsilon$ : 0.00001, Momentum: 0.1                 |
| 12          | ReLU      | -                                                   |
| 13          | Conv      | Depth: 64, Kernel Size: 3x3, Stride: 1, Padding: 1  |
| 14          | BatchNorm | $\epsilon$ : 0.00001, Momentum: 0.1                 |
| 15          | Conv      | Depth: 128, Kernel Size: 3x3, Stride: 2, Padding: 1 |
| 16          | BatchNorm | $\epsilon$ : 0.00001, Momentum: 0.1                 |
| 17          | ReLU      | -                                                   |
| 18          | Conv      | Depth: 128, Kernel Size: 3x3, Stride: 1, Padding: 1 |
| 19          | BatchNorm | $\epsilon$ : 0.00001, Momentum: 0.1                 |
| 20          | Conv      | Depth: 128, Kernel Size: 1x1, Stride: 2             |
| 21          | BatchNorm | $\epsilon$ : 0.00001, Momentum: 0.1                 |
| 22          | Conv      | Depth: 128, Kernel Size: 3x3, Stride: 1, Padding: 1 |
| 23          | BatchNorm | $\epsilon$ : 0.00001, Momentum: 0.1                 |
| 24          | ReLU      | -                                                   |
| 25          | Conv      | Depth: 128, Kernel Size: 3x3, Stride: 1, Padding: 1 |
| 26          | BatchNorm | $\epsilon$ : 0.00001, Momentum: 0.1                 |
| 27          | Conv      | Depth: 256, Kernel Size: 3x3, Stride: 2, Padding: 1 |
| 28          | BatchNorm | $\epsilon$ : 0.00001, Momentum: 0.1                 |
| 29          | ReLU      | -                                                   |
| 30          | Conv      | Depth: 256, Kernel Size: 3x3, Stride: 1, Padding: 1 |
| 31          | BatchNorm | $\epsilon$ : 0.00001, Momentum: 0.1                 |
| 32          | Conv      | Depth: 256, Kernel Size: 1x1, Stride: 2             |
| 33          | BatchNorm | $\epsilon$ : 0.00001, Momentum: 0.1                 |
| 34          | Conv      | Depth: 256, Kernel Size: 3x3, Stride: 1, Padding: 1 |
| 35          | BatchNorm | $\epsilon$ : 0.00001, Momentum: 0.1                 |
| 36          | ReLU      | -                                                   |
| 37          | Conv      | Depth: 256, Kernel Size: 3x3, Stride: 1, Padding: 1 |
| 38          | BatchNorm | $\epsilon$ : 0.00001, Momentum: 0.1                 |
| 39          | Conv      | Depth: 512, Kernel Size: 3x3, Stride: 2, Padding: 1 |
| 40          | BatchNorm | $\epsilon$ : 0.00001, Momentum: 0.1                 |
| 41          | ReLU      | -                                                   |
| 42          | Conv      | Depth: 512, Kernel Size: 3x3, Stride: 1, Padding: 1 |
| 43          | BatchNorm | $\epsilon$ : 0.00001, Momentum: 0.1                 |
| 44          | Conv      | Depth: 512, Kernel Size: 1x1, Stride: 2             |
| 45          | BatchNorm | $\epsilon$ : 0.00001, Momentum: 0.1                 |
| 46          | Conv      | Depth: 512, Kernel Size: 3x3, Stride: 1, Padding: 1 |
| 47          | BatchNorm | $\epsilon$ : 0.00001, Momentum: 0.1                 |
| 48          | ReLU      | -                                                   |
| 49          | Conv      | Depth: 512, Kernel Size: 3x3, Stride: 1, Padding: 1 |
| 50          | BatchNorm | $\epsilon$ : 0.00001, Momentum: 0.1                 |
| 51          | AvgPool   | -                                                   |
| 52          | FC        | Width: 1000                                         |

## References

- [1] P. Bühlmann and T. Hothorn. Boosting algorithms: Regularization, prediction and model fitting. *Statistical Science*, pages 477–505, 2007. 2
- [2] Y. Freund, R. E. Schapire, et al. Experiments with a new boosting algorithm. In *Icml*, volume 96, pages 148–156. Bari, Italy, 1996. 2
- [3] J. Friedman, T. Hastie, R. Tibshirani, et al. Additive logistic regression: a statistical view of boosting (with discussion and a rejoinder by the authors). *The annals of statistics*, 28(2):337–407, 2000. 2
- [4] G. Hinton. Neural networks for machine learning. In *Coursera*, 2012. 3
- [5] M. Rastegari, V. Ordonez, J. Redmon, and A. Farhadi. Xnor-net: Imagenet classification using binary convolutional neural networks. In *European Conference on Computer Vision*, pages 525–542. Springer, 2016. 3
